# Supplementary material
Source: Springer Nature journal article supplement (https://www.springermedizin.de/resource/supplementary/13256_2013_2591_MOESM1_ESM.pdf/9650012)

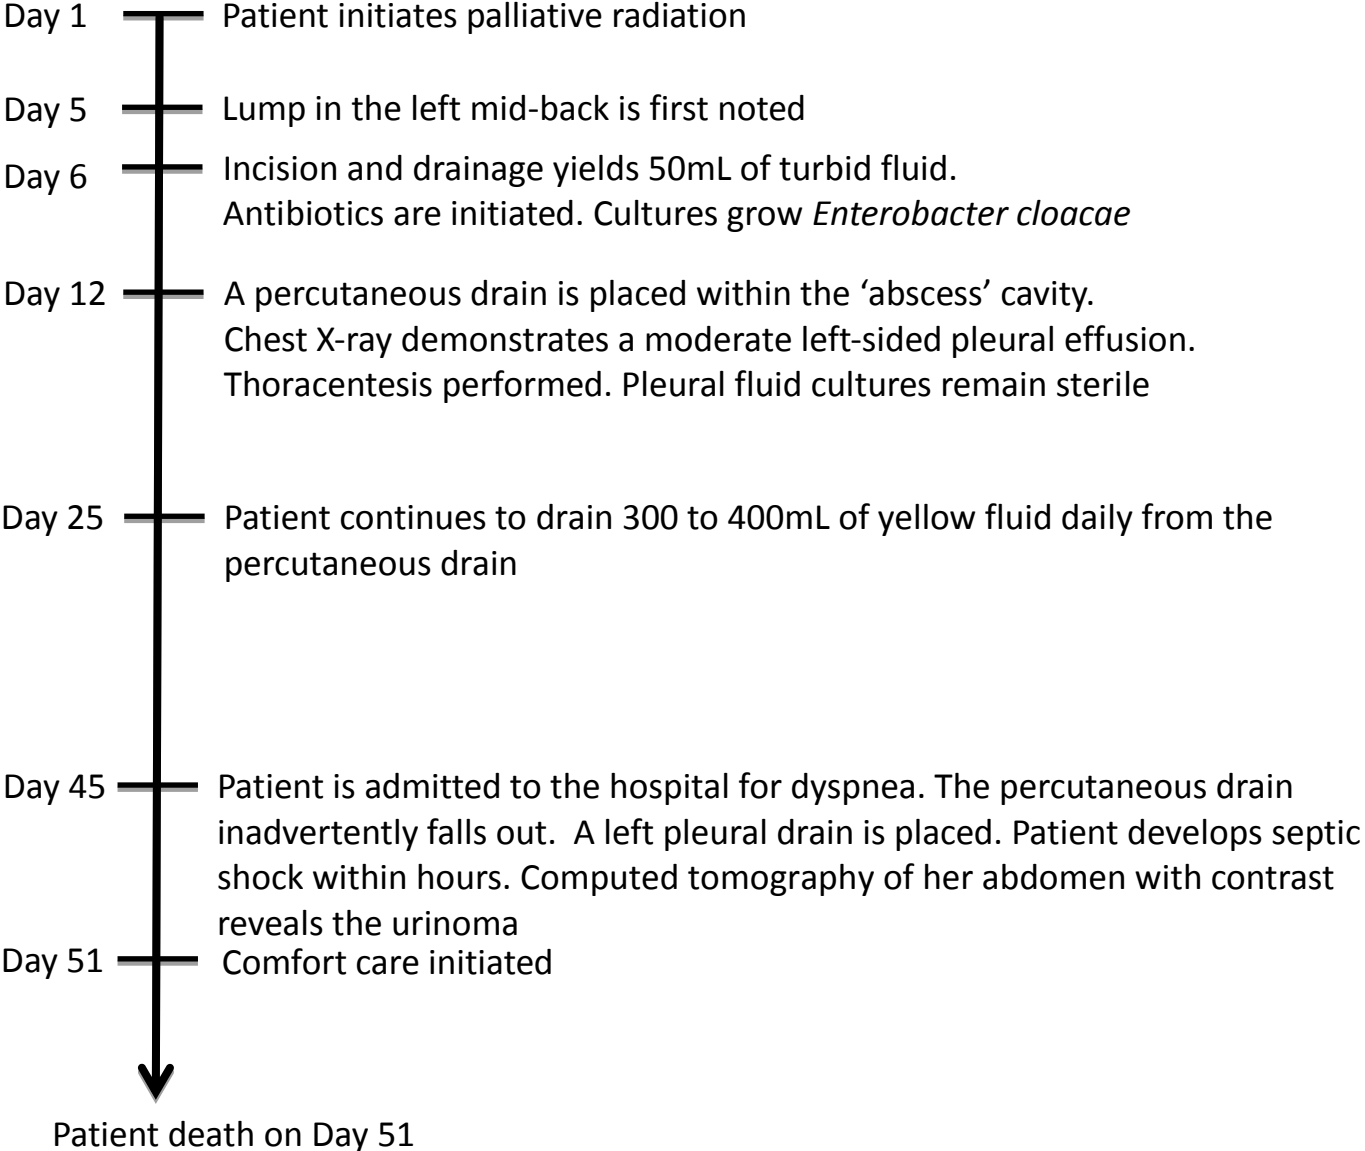

Supplement: MOESM1 [file 9650012]
